## Practice Point

# Vaccine-preventable diseases: Uncommon disease primer for the front-line provider

Shalini Desai, Noni MacDonald

Canadian Paediatric Society, Infectious Diseases and Immunization Committee, Ottawa, Ontario

**Correspondence:** Canadian Paediatric Society, 100–2305 St Laurent Blvd, Ottawa, Ontario K1G 4J8. E-mail [info@cps.ca](mailto:info@cps.ca),

website [www.cps.ca](http://www.cps.ca)

For the full text document, visit [www.cps.ca/en/documents](http://www.cps.ca/en/documents)

This practice point provides quick information for front-line health care providers on vaccine-preventable diseases which, given the success of immunization programs in Canada, are now uncommon or rarely seen. These infections can still occur in children and youth from Canada and elsewhere, and their clinical identification has important public health implications. Knowledge of signs and symptoms, immunizing travellers and newcomers to Canada, awareness of outbreaks in-community and elsewhere, and early consultation with an expert in infectious diseases and public health authorities in suspected cases, are key preventive care measures.

**Keywords:** Paediatrics; Testing; Vaccine-preventable diseases

## CANADIAN PAEDIATRIC SOCIETY INFECTIOUS DISEASES AND IMMUNIZATION COMMITTEE

**Members:** Michelle Barton-Forbes MD; Natalie A. Bridger MD; Shalini Desai MD; Michael Forrester MD; Ruth Grimes MD (Board Representative); Charles Hui MD (past member); Nicole Le Saux MD (Chair); Marina I Salvadori MD (past member); Otto G. Vanderkooi MD

**Liaisons:** Upton D. Allen MBBS, Canadian Pediatric & Perinatal HIV/AIDS Research Group; Tobey Audcent MD, Committee to Advise on Tropical Medicine and Travel (CATMAT), Public Health Agency of Canada; Carrie Byington MD, Committee on Infectious Diseases, American Academy of Pediatrics; Fahamia Koudra MD, College of Family Physicians of Canada; Rhonda Kropp BScN MPH, Public Health Agency of Canada; Marc Lebel MD, IMPACT (Immunization Monitoring Program, ACTIVE); Jane McDonald MD, Association of Medical Microbiology and Infectious Disease Canada; Dorothy L. Moore MD, National Advisory Committee on Immunization (NACI);

**Consultant:** Noni E. MacDonald MD

**Principal authors:** Shalini Desai MD, Noni E. MacDonald MD
